# Supplementary material for: Photoelectrochemical aptamer sensor based on AgInS2 and ZnS co-sensitized TiO2 for the detection of Hg2+
Source: Royal Society of Chemistry journal article supplement (doi:10.1039/d3nj02675b), 2023-01-01
Supplement: d3nj02675b1.pdf [file d3nj02675b1.pdf]

## Supporting Information

Photoelectrochemical aptamer sensor based on AgInS<sub>2</sub> and ZnS co-sensitized TiO<sub>2</sub> for detection of Hg<sup>2+</sup>

Jing Luo<sup>a</sup>, Xiang Ren<sup>\*a</sup>, Huan Wang<sup>a</sup>, Dan Wu<sup>a</sup>, Dawei Fan<sup>\*a</sup>,

Yingju Fan<sup>\*a</sup>, Qin Wei<sup>\*a</sup>

<sup>a</sup> Collaborative Innovation Center for Green Chemical Manufacturing and Accurate Detection,

Key Laboratory of Interfacial Reaction & Sensing Analysis in Universities of Shandong,

School of Chemistry and Chemical Engineering, University of Jinan, Jinan 250022, People's

Republic of China

**\* Corresponding author**

Tel: +86-531-82760510

E-mail: jndxfandawei@126.com (D. Fan)

## 1. Materials and reagents

Hydrochloric acid (HCl), tetrabutyl titanate, ethylene glycol, 3-mercaptopropionic acid, L-ascorbic acid (AA), nickel nitrate hexahydrate and thioglycolic acid (TGA) were purchased from Shanghai Macklin Biochemical Co., Ltd. (Shanghai, China).  $\text{HAuCl}_4 \cdot 6\text{H}_2\text{O}$  was purchased from Alfa Aesar.  $\text{In}(\text{CH}_3\text{CO}_2)_3$  was obtained from Tianjin ZhiYuan Reagent Co., Ltd. Silver nitrate ( $\text{AgNO}_3$ ),  $\text{Zn}(\text{Ac})_2$  and  $\text{Na}_2\text{S}$  was obtained from Sinopharm Chemical Reagent Co., Ltd (China).

Phosphate buffered saline (PBS, 0.1 M  $\text{KH}_2\text{PO}_4$  and 0.1 M  $\text{Na}_2\text{HPO}_4$ ) containing AA was used as an electrolyte for the PEC measurements. Indium tin oxide (ITO) glass was obtained from Zhuhai Kaivo Electronic Components Co., Ltd, China. Ultrapure water (Milli-Q, Millipore) used in all experiments was deionized to  $18.25 \text{ M}\Omega \cdot \text{cm}$ .

## 2. Apparatus

The PEC tests were obtained using a CHI760E electrochemical workstation, which was purchased from Chenhua Instrument Shanghai Co., Ltd, China. Meanwhile, a 100 W LED lamp of white light was used for an irradiation source. Scanning electron microscope (SEM) images and energy dispersive spectrometry (EDS) were obtained using a field emission SEM (Zeiss, Germany). X-ray diffraction (XRD) patterns were collected on a D8 advance X-ray diffractometer (Bruker AXS, Germany). UV-vis spectra were obtained on a Shimadzu UV-3600 Plus spectrometer (Japan). Electrochemical impedance spectroscopy (EIS) was examined using an electrochemical workstation (Zahner Zennium PP211, Germany) using  $[\text{Fe}(\text{CN})_6]^{3-/4-}$  as redox probe. Mott–Schottky measurement was conducted on electrochemical workstation (CHI760E

Chenhua Instrument Company, Shanghai, China) in 0.2 M Na<sub>2</sub>SO<sub>4</sub> aqueous solution.

### 3. The synthesis method of AgInS<sub>2</sub>

Silver nitrate (AgNO<sub>3</sub>) (84.94 mg) and In(CH<sub>3</sub>CO<sub>2</sub>)<sub>3</sub> (291.95 mg) were dissolved in 50 mL of ethylene glycol and 610 μL of 3-mercaptopropionic acid was added. The mixture was purged with N<sub>2</sub> for 10 minutes to remove the oxygen. The mixture was heated at 150 °C for 30 minutes under N<sub>2</sub> atmosphere. After centrifugation and washing with water, the product was obtained by vacuum drying at 60 °C.

### 4. The synthesis method of Au nanoparticles

1 mL of 1% chlorauric acid solution was diluted to 100 mL in high purity water and boiled with magnetic agitation. After boiling, 2.5 mL 1% sodium citrate was added to the solution. After boiling until wine red, the solution is heated for another 5 minutes, cool at room temperature and set aside.

### 5. The characterization of TiO<sub>2</sub>/AgInS<sub>2</sub>/ZnS

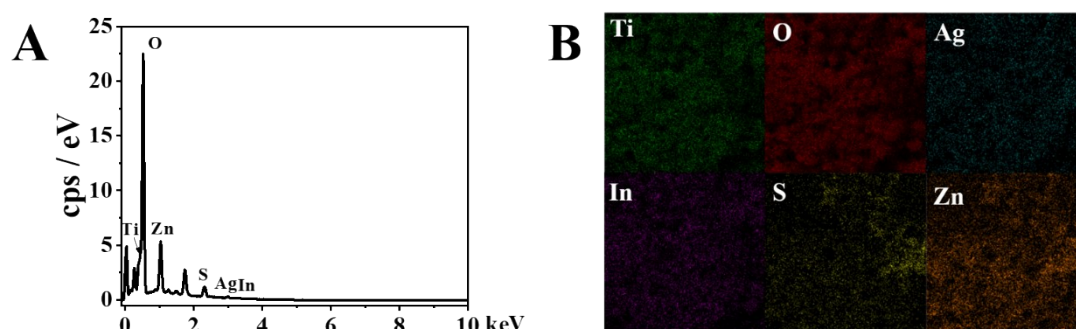

Fig. S1. EDS spectra (A) and the corresponding element mappings (B) of TiO<sub>2</sub>/AgInS<sub>2</sub>/ZnS.

### 6. The SEM image of NiCo-MOF and NiCo-MOF@Au

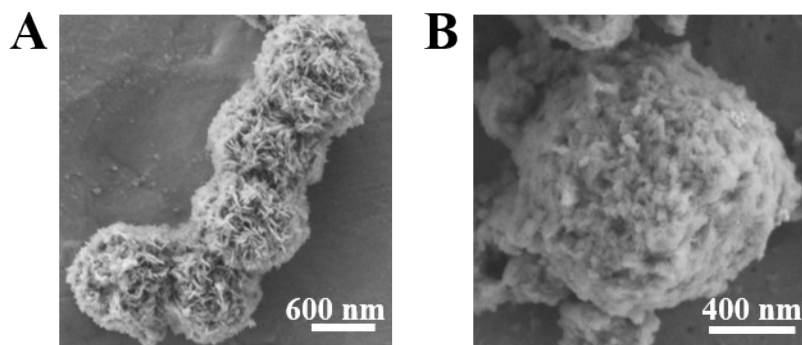

Fig. S2. SEM image of NiCo-MOF (A) and NiCo-MOF@Au (B).

## 7. Optimization of analytical parameters

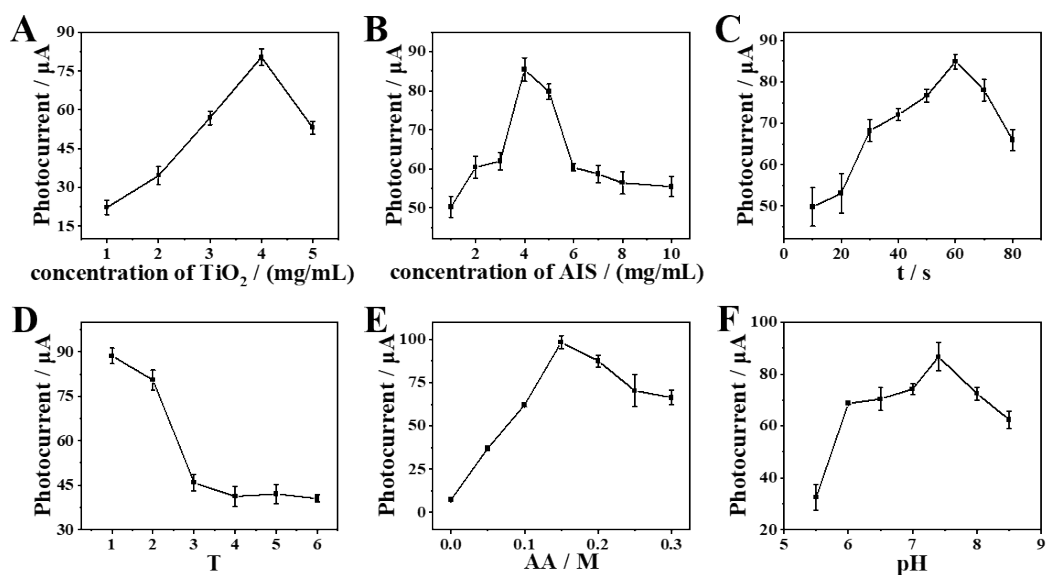

Fig. S3. Effects of the concentration of  $\text{TiO}_2$  (A), the concentration of  $\text{AgInS}_2$  (B), the SILAR time of  $\text{ZnS}$  (C), the SILAR cycle times of  $\text{ZnS}$  (D), the concentration of AA in the PBS buffersolution (E) and the pH value of PBS (F) on the photocurrent response of the ITO/ $\text{TiO}_2$ / $\text{AgInS}_2$ / $\text{ZnS}$  electrode.

## 8. Comparison of various methods for Hg<sup>2+</sup> detection

**Table S1.** Comparison of various methods for Hg<sup>2+</sup> detection

| Methods                                | Linear range      | LOD          | Reference |
|----------------------------------------|-------------------|--------------|-----------|
| Self-powered nanosensor                | 10 nM-1 $\mu$ M   | 1.7 nM       | 1         |
| Colorimetric sensor                    | 40-1200 $\mu$ g/L | 10 $\mu$ g/L | 2         |
| Fluorescence sensing platform          | 0.002-30 $\mu$ M  | 7 nM         | 3         |
| Organic field-effect transistor sensor | 1-60 nM           | 2.4 nM       | 4         |
| Electrochemiluminescence assay         | 10 pM-100 $\mu$ M | 2.9 pM       | 5         |
| Colorimetric/fluorescence immunoassay  | 1 nM-30 $\mu$ M   | 1 nM         | 6         |
| Photoelectrochemical aptasensor        | 1 mM-0.1 pM       | 34 fM        | This work |

## 9. Detection of Hg<sup>2+</sup> in real water samples at different concentrations.

Taking tap water, lake water and untreated industrial wastewater in Jinan city as the research object, the application ability of this method in actual water samples was evaluated. Firstly, the collected samples were left to rest for 2 hours. The supernatant was centrifuged at 10,000 r/min for 10 min, and then filtered by 0.22  $\mu$ m filter membrane. The concentration of Hg<sup>2+</sup> in the collected untreated industrial wastewater is 2.7 nM.

**Table S2.** Detection of Hg<sup>2+</sup> in tap water different concentrations.

| samples    | the addition | AFS <sup>a</sup> | proposed                     | RSD <sup>b</sup> |
|------------|--------------|------------------|------------------------------|------------------|
|            | conten(nM)   | (nM)             | aptasensor <sup>a</sup> (nM) | (%, n=3)         |
| Tap water  | 0.10         | <0.20            | 0.11                         | 3.0              |
|            | 1.00         | 0.98             | 1.06                         | 1.3              |
|            | 10.0         | 9.97             | 10.03                        | 2.8              |
| Lake water | 0.10         | <0.20            | 0.10                         | 1.5              |
|            | 1.00         | 1.03             | 1.10                         | 2.7              |
|            | 10.0         | 10.07            | 10.10                        | 2.9              |
| untreated  | 0.10         | 2.86             | 2.87                         | 1.5              |
| industrial | 1.00         | 3.77             | 3.73                         | 1.9              |
| wastewater | 10.0         | 12.65            | 12.68                        | 2.2              |

<sup>a</sup>Represents the average of three repeated measurements. <sup>b</sup>Represents the relative standard deviation.

## References

1. Y.-H. Tsao, R.A. Husain, Y.-J. Lin, I. Khan, S.-W. Chen, and Z.-H. Lin, *Nano Energy*, 2019, **62**, 268-274.
2. Monisha, K. Shrivastava, T. Kant, S. Patel, R. Devi, N.S. Dahariya, S. Pervez, M.K. Deb, M.K. Rai, and J. Rai, *J. Hazard. Mater.*, 2021, **414**, 125440.
3. Z. Lu, J. Li, K. Ruan, M. Sun, S. Zhang, T. Liu, J. Yin, X. Wang, H. Chen, Y. Wang, P. Zou, Q. Huang, J. Ye, and H. Rao, *Chem. Eng. J.*, 2022, **435**.
4. P.W. Sayyad, N.N. Ingle, T. Al-Gahouari, M.M. Mahadik, G.A. Bodkhe, S.M. Shirsat, and M.D. Shirsat, *Appl. Phys. A: Mater. Sci. Process.*, 2021, **127**.
5. N. Ma, X. Ren, H. Wang, X. Kuang, D. Fan, D. Wu, and Q. Wei, *Anal. Chem.*, 2020, **92**, 14069-14075.
6. L. Li, L. Gui, and W. Li, *Microchim. Acta*, 2015, **182**, 1977-1981.
